# Supplementary figures and images for: Whole Genome Analysis of Cyclin Dependent Kinase (CDK) Gene Family in Cotton and Functional Evaluation of the Role of CDKF4 Gene in Drought and Salt Stress Tolerance in Plants
Source: MDPI journal article supplement (doi:10.3390/ijms19092625), 2018-09-05

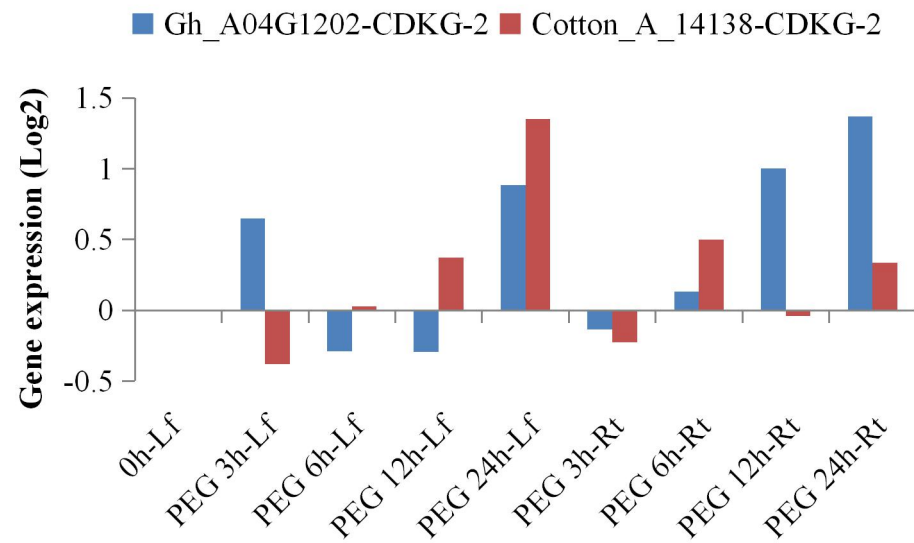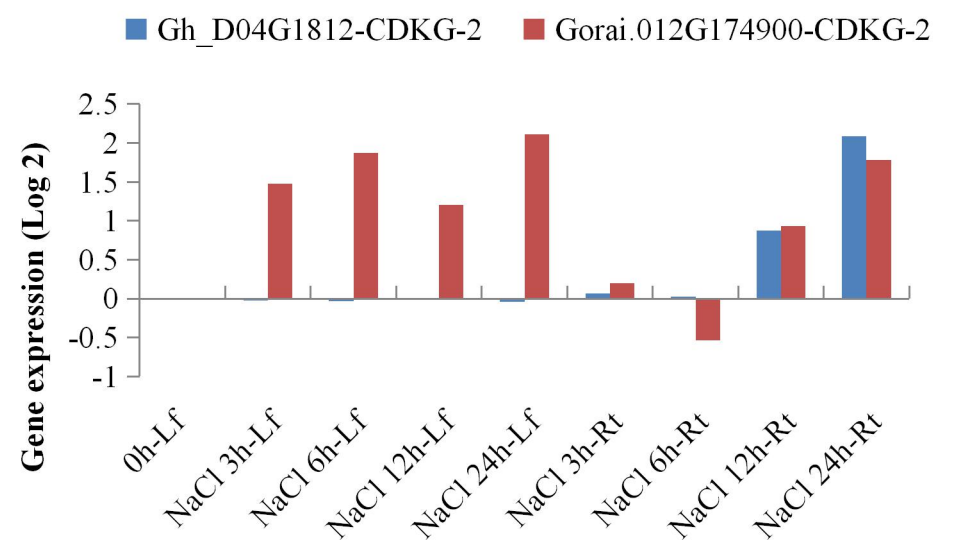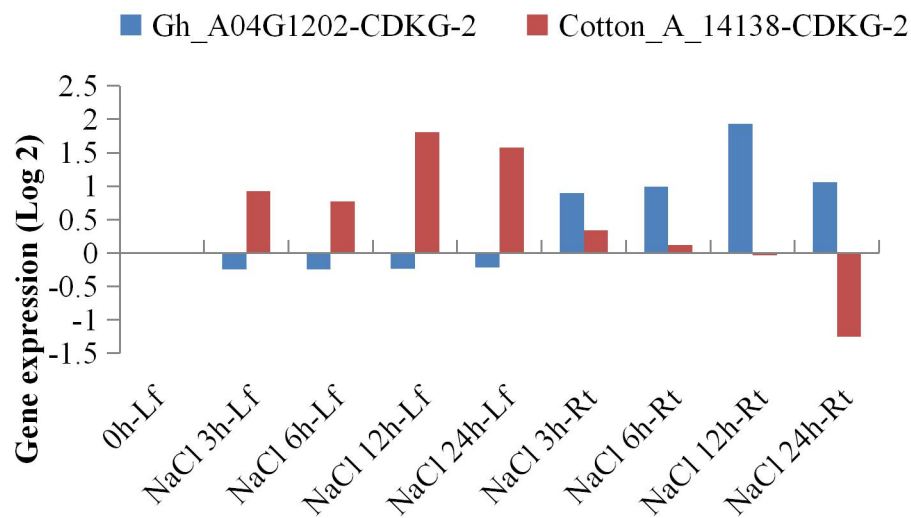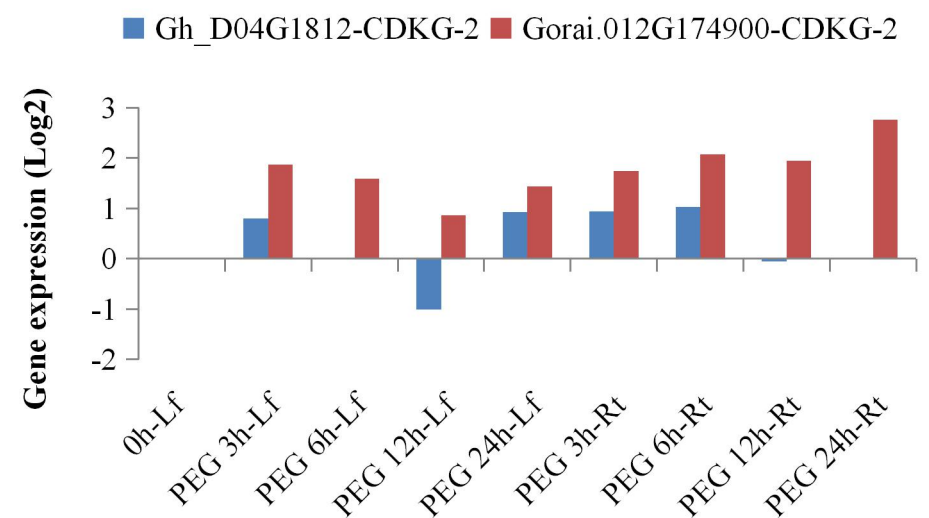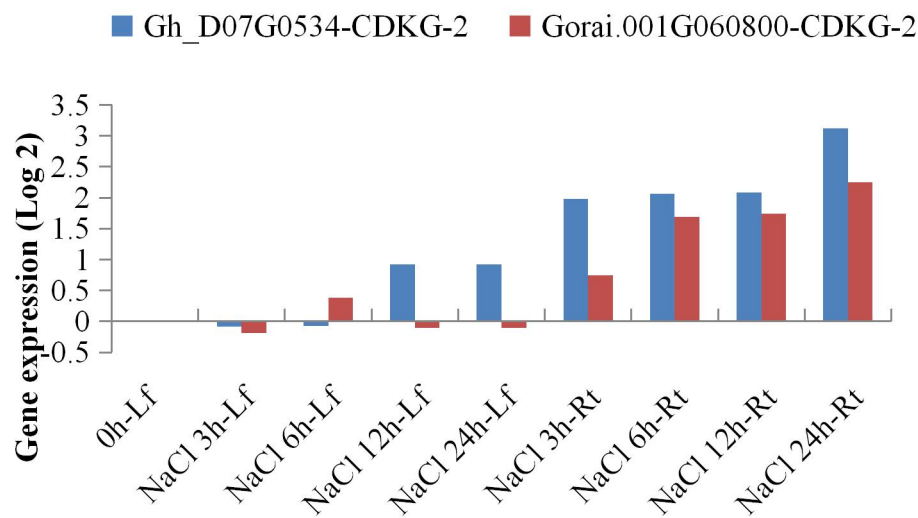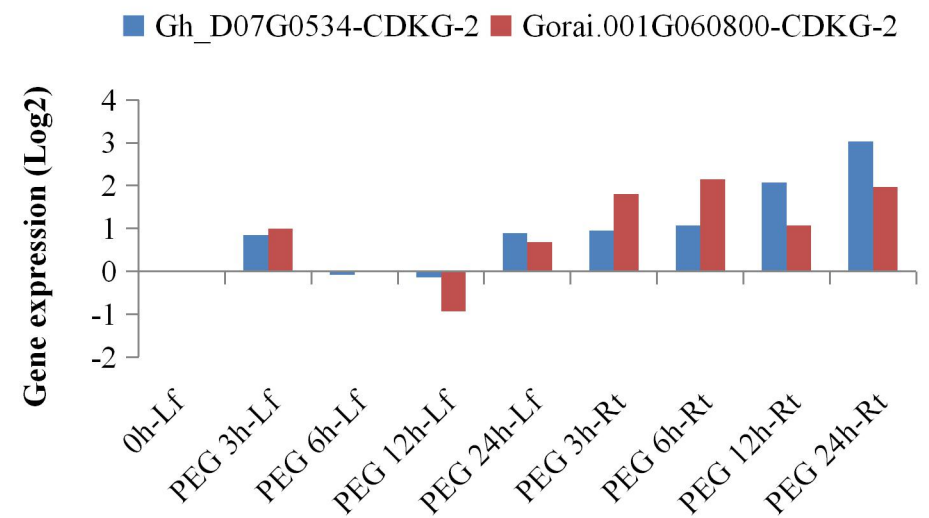

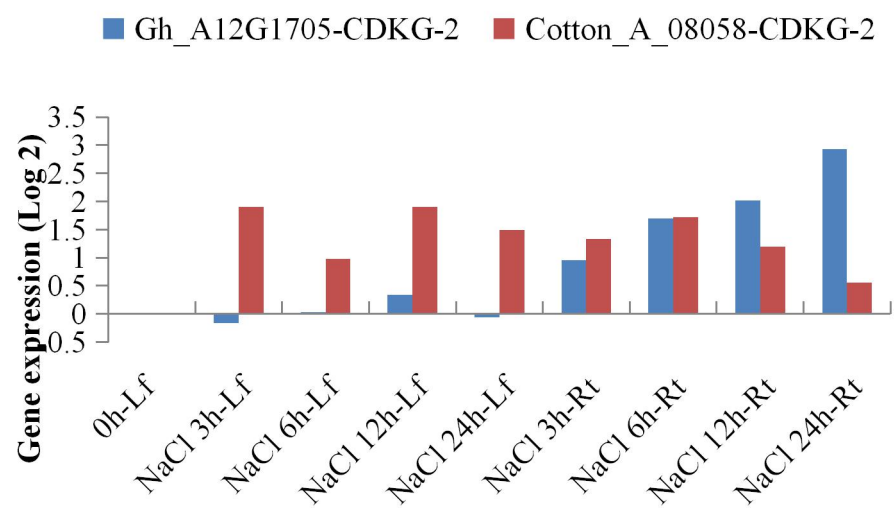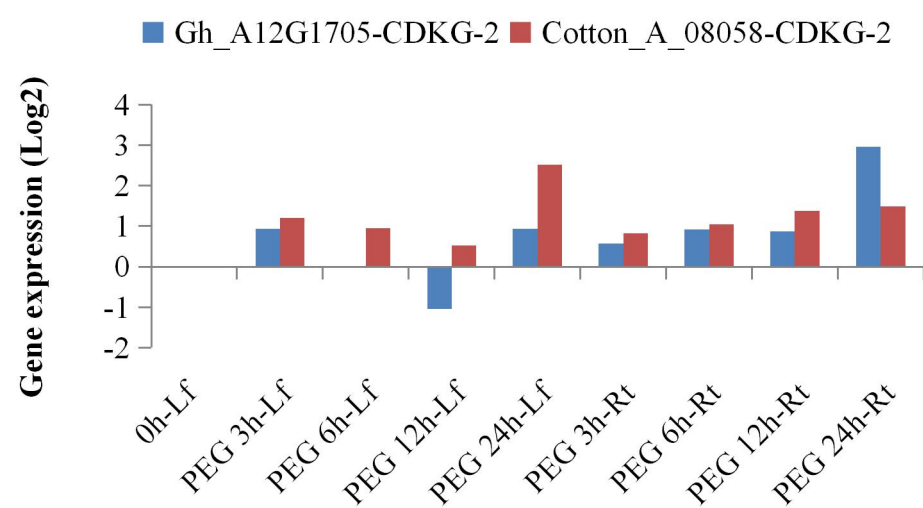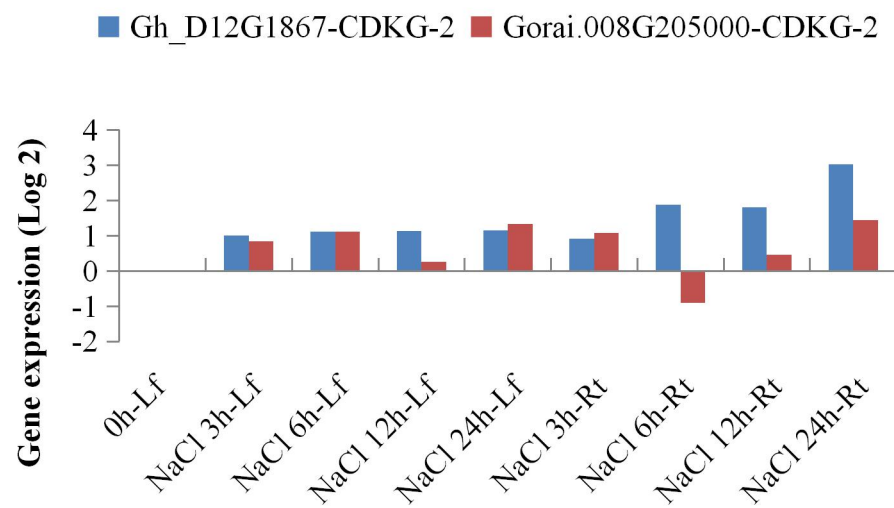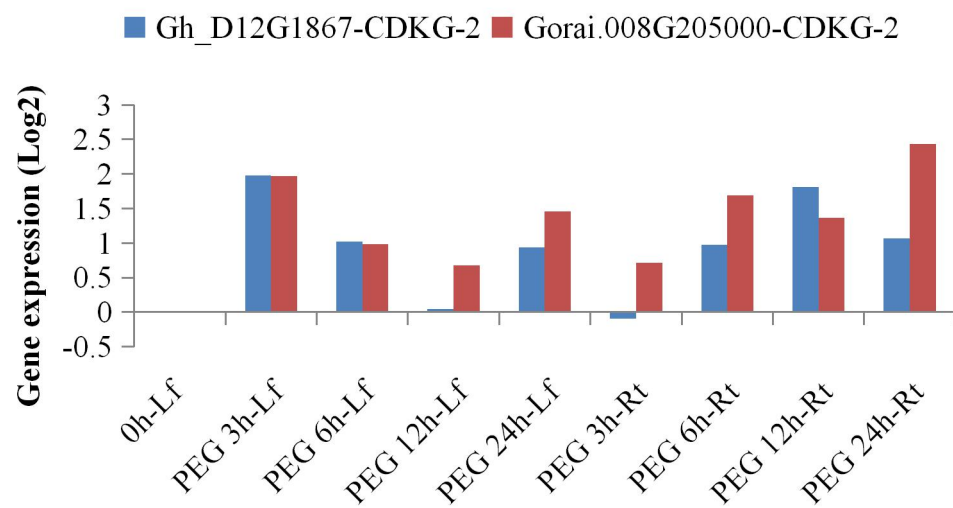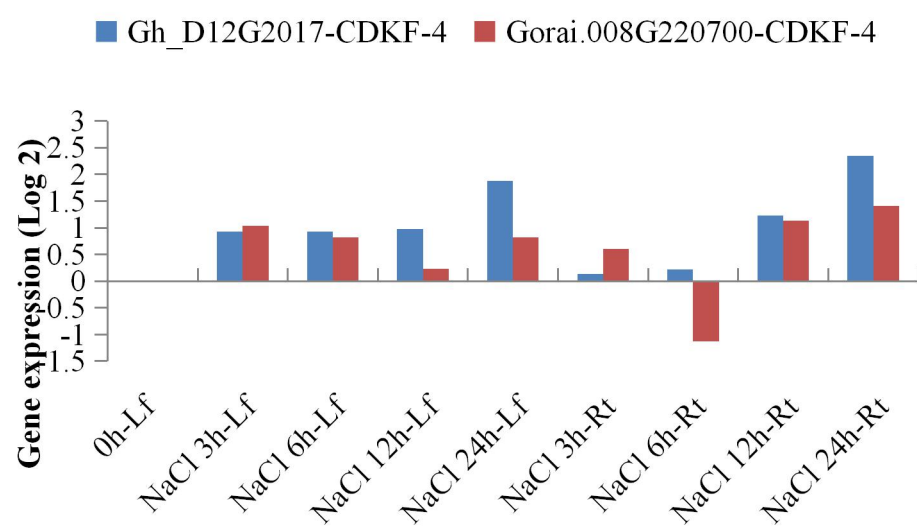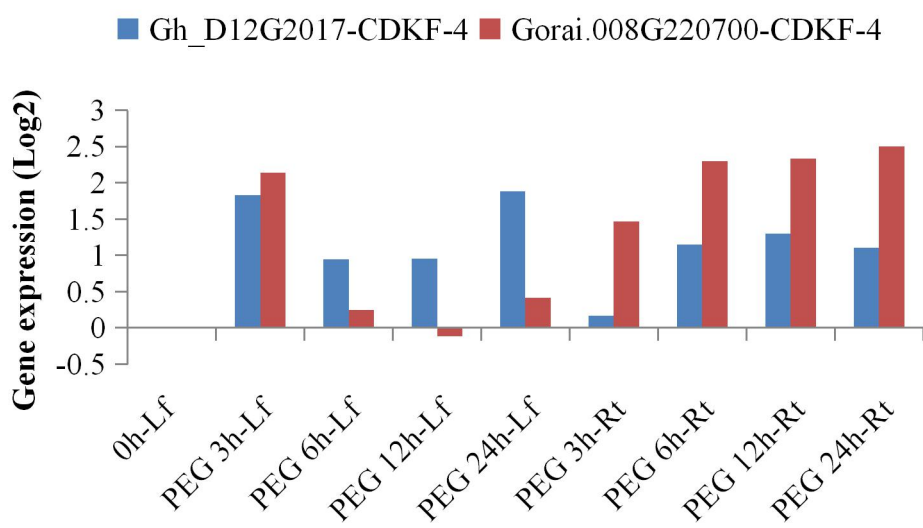

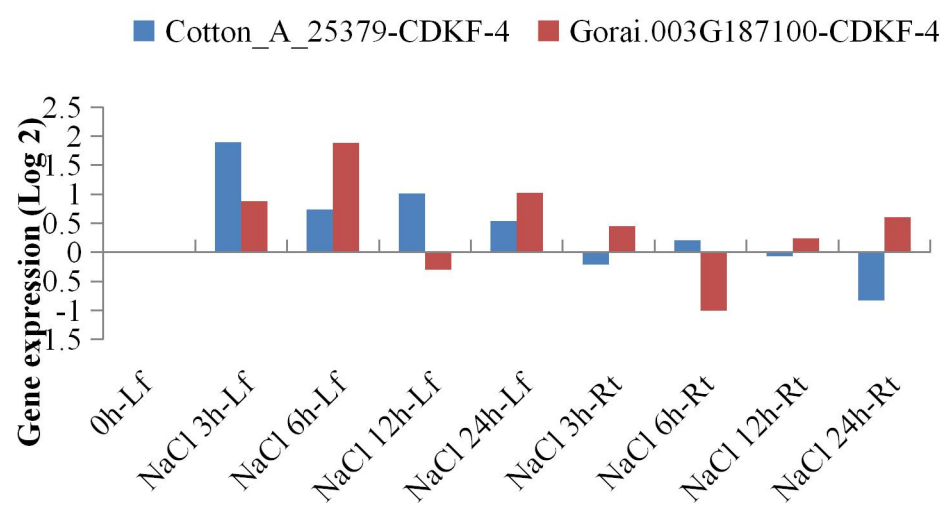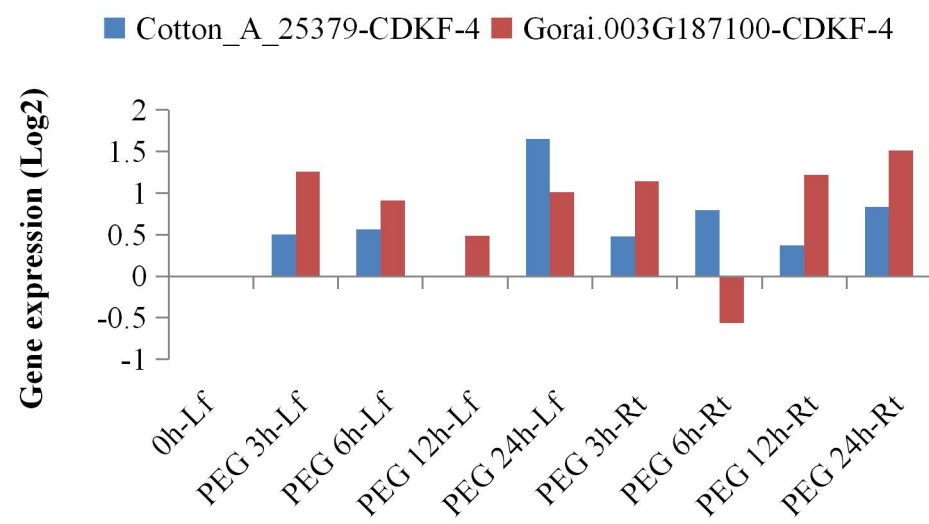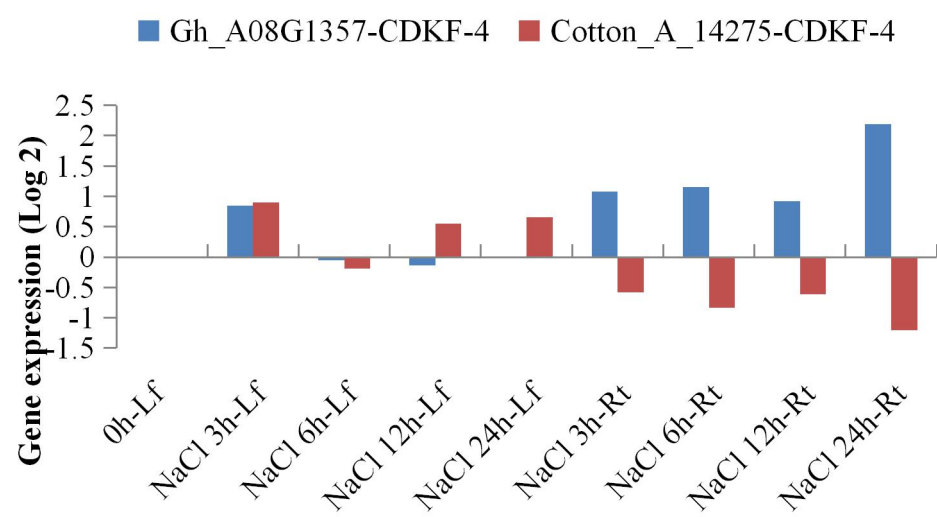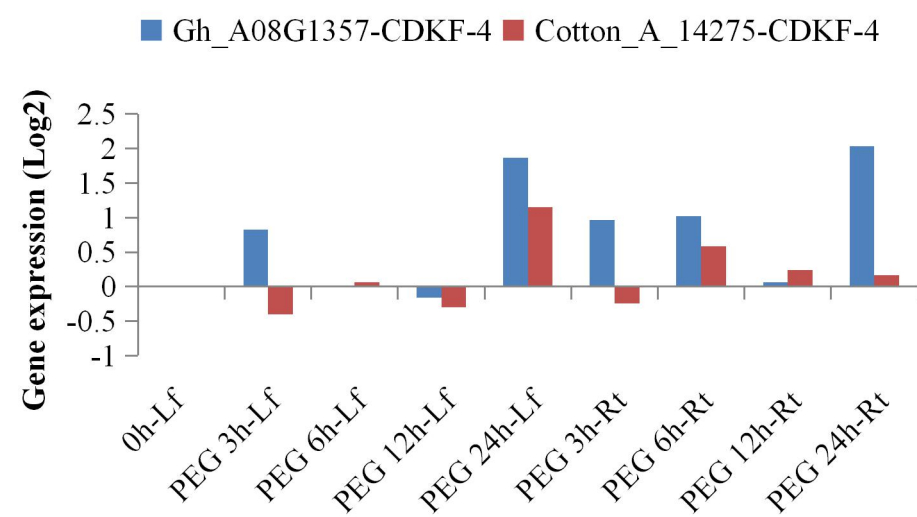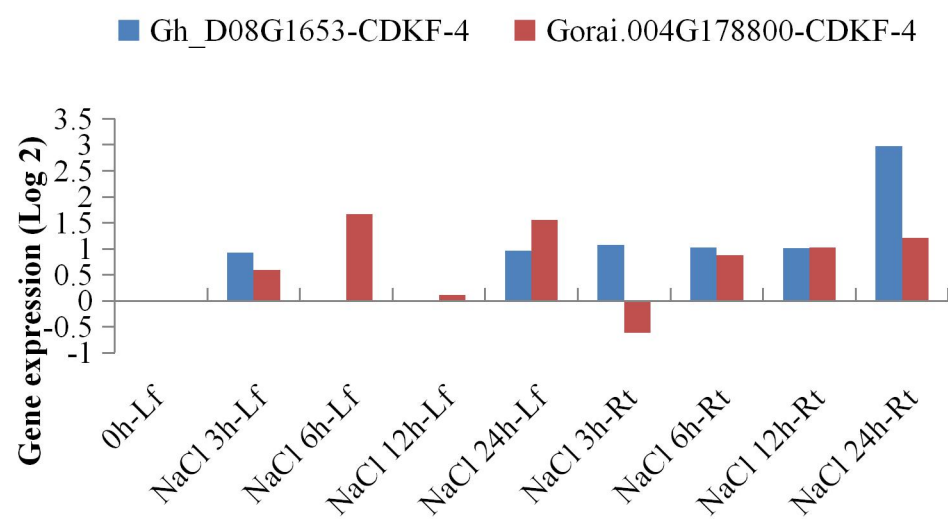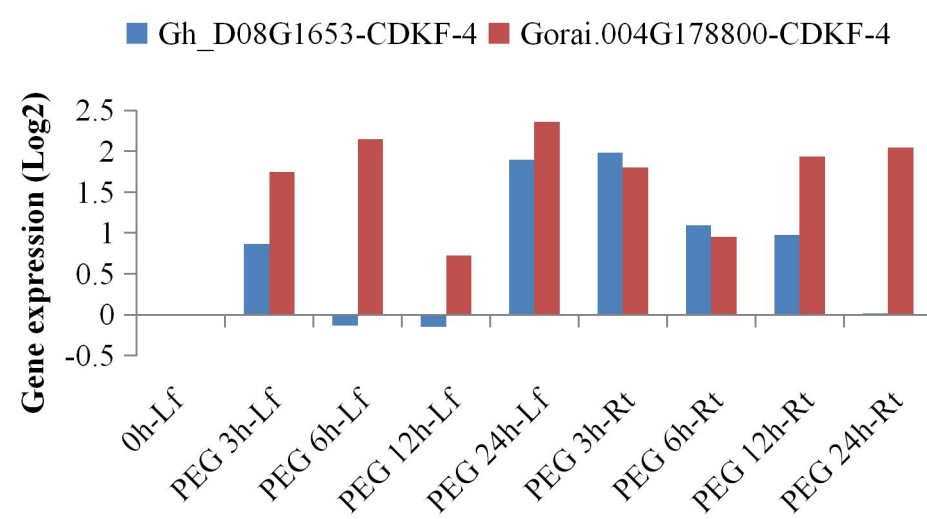

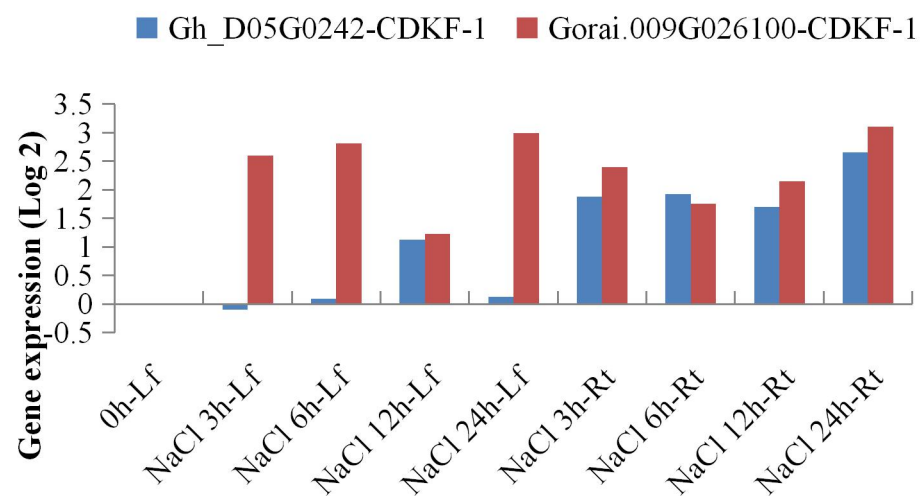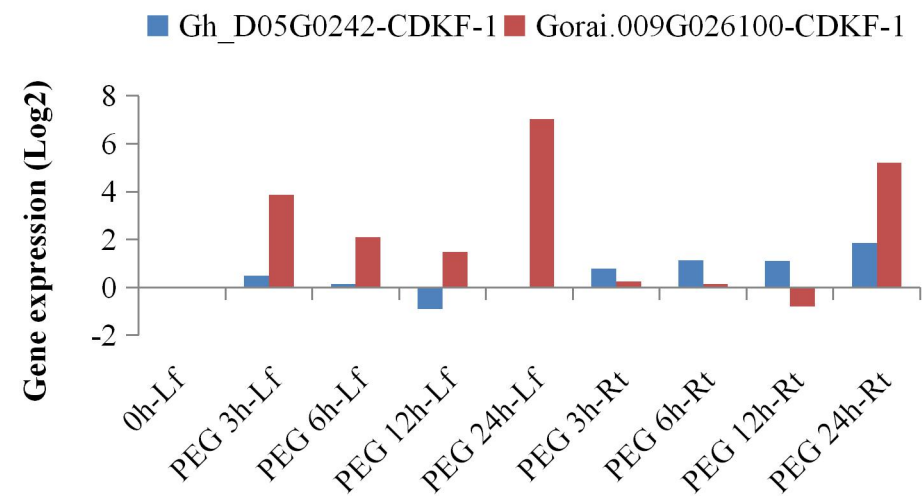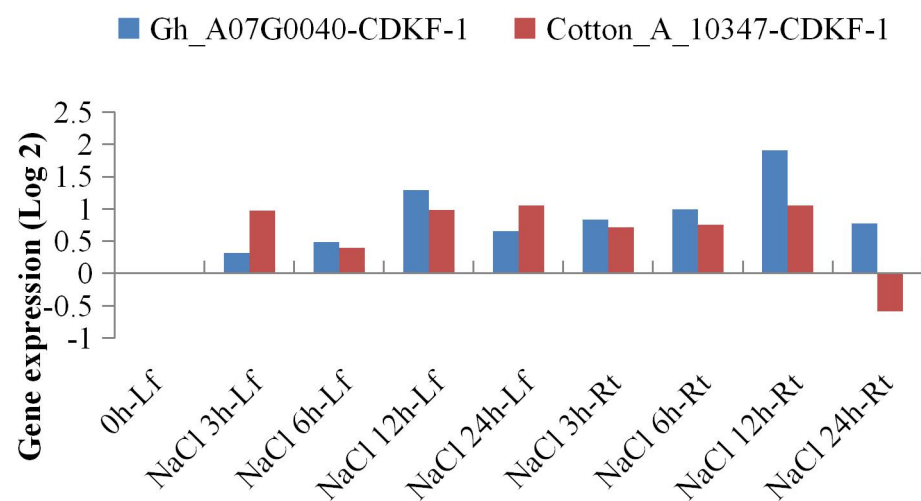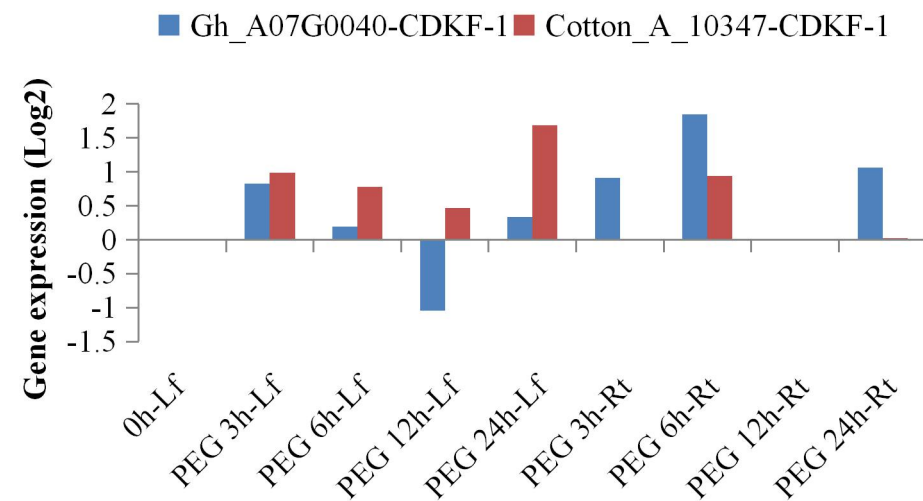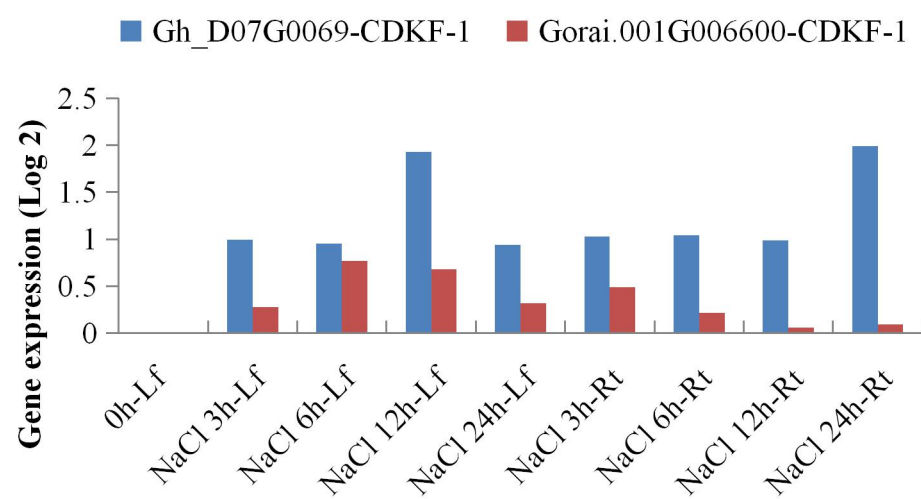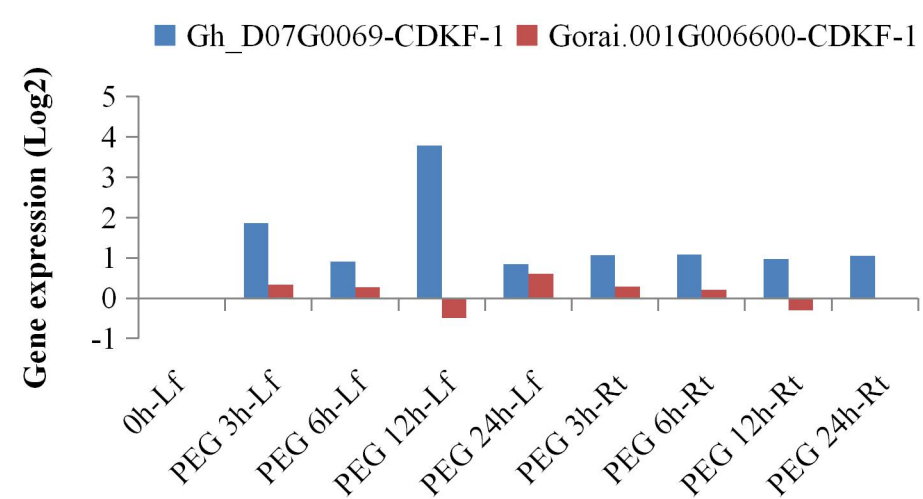

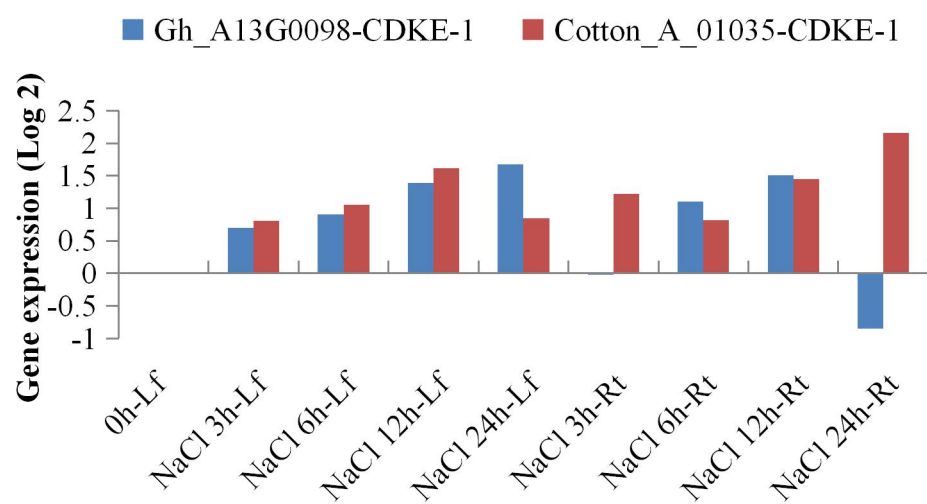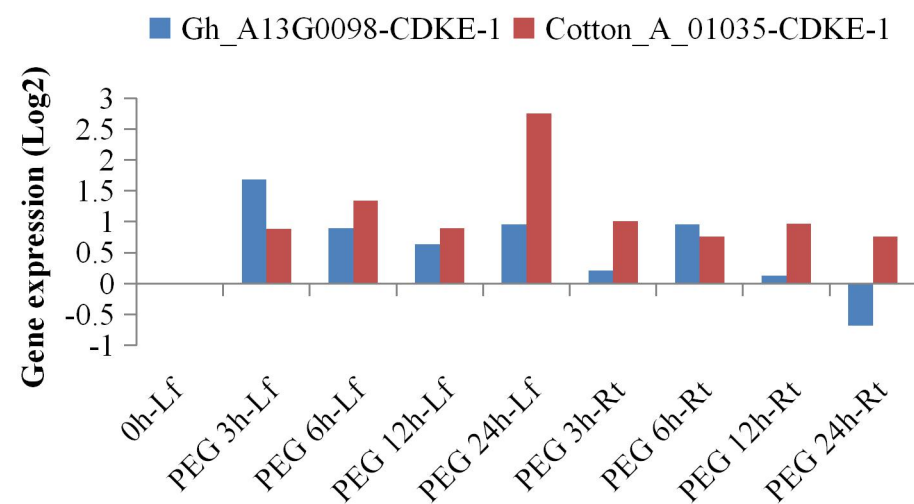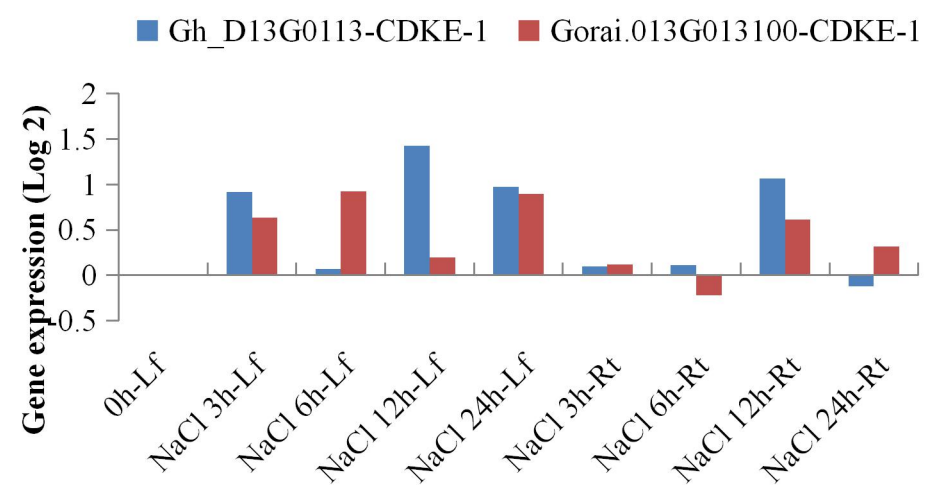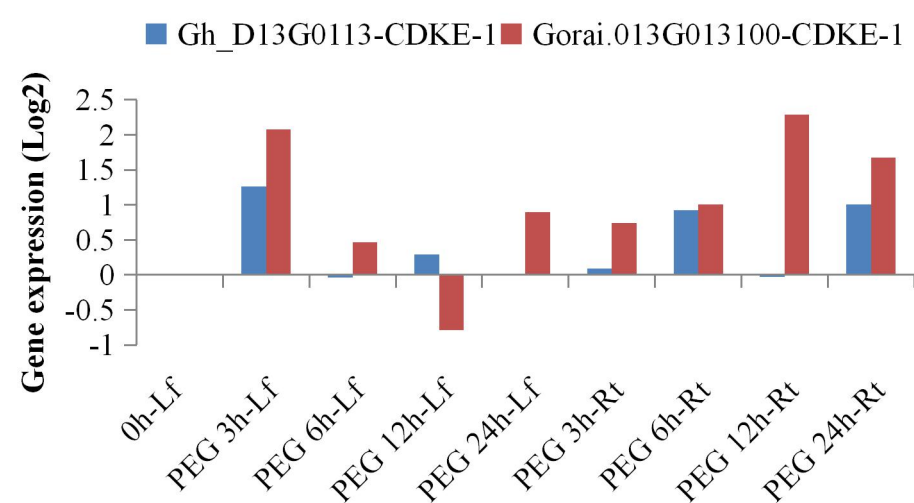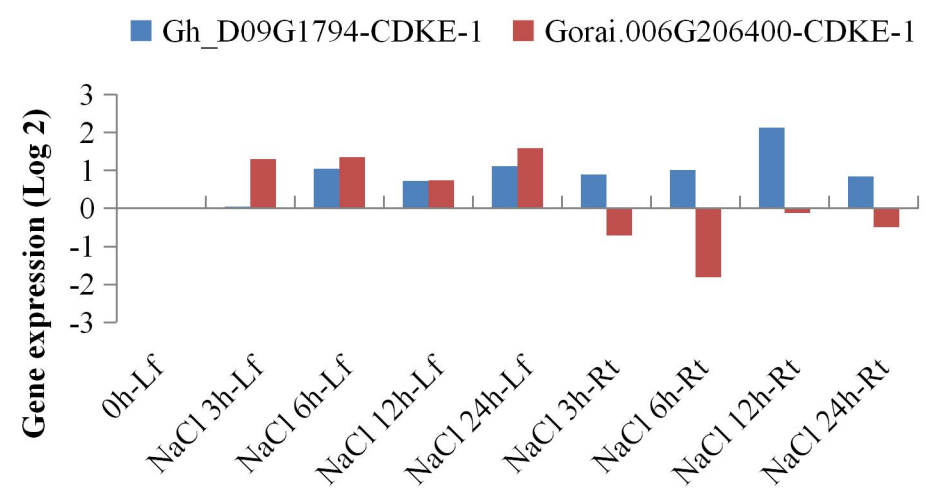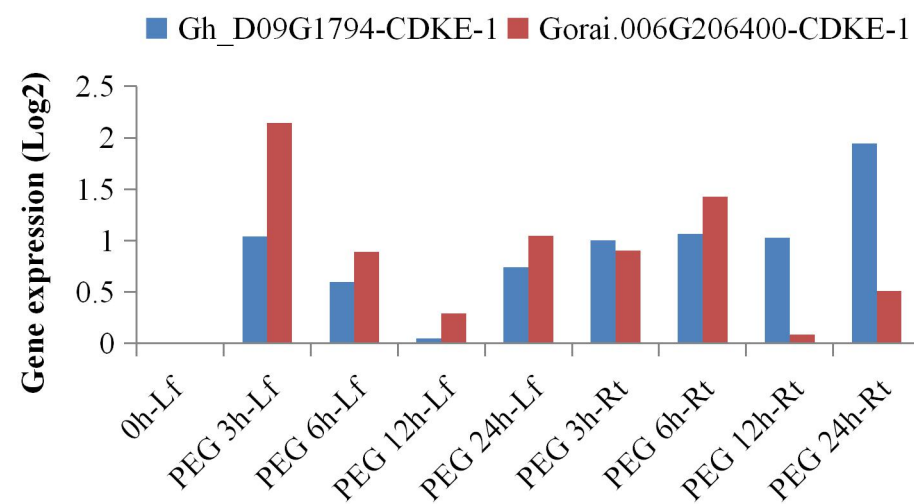



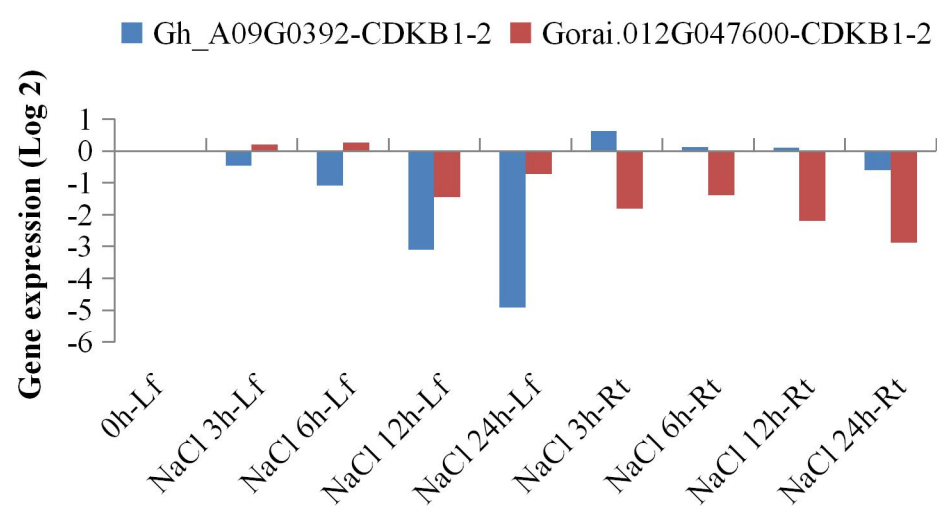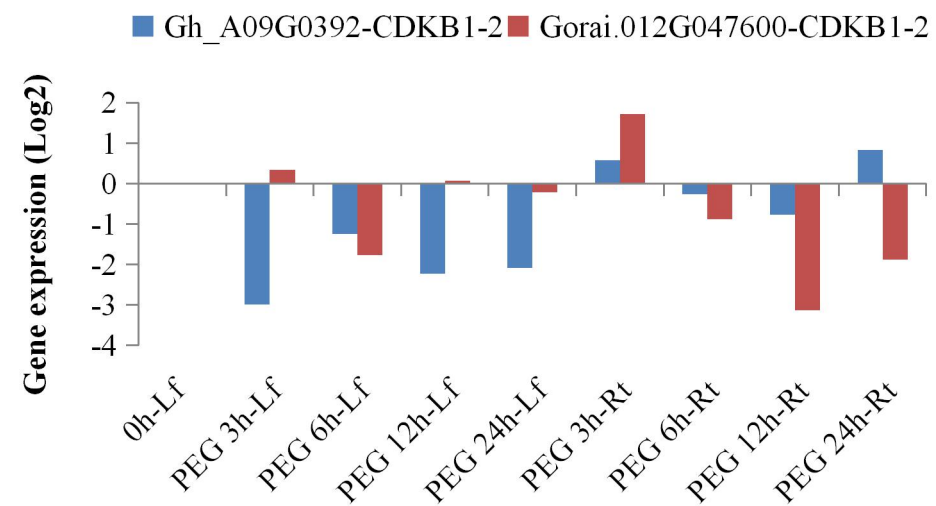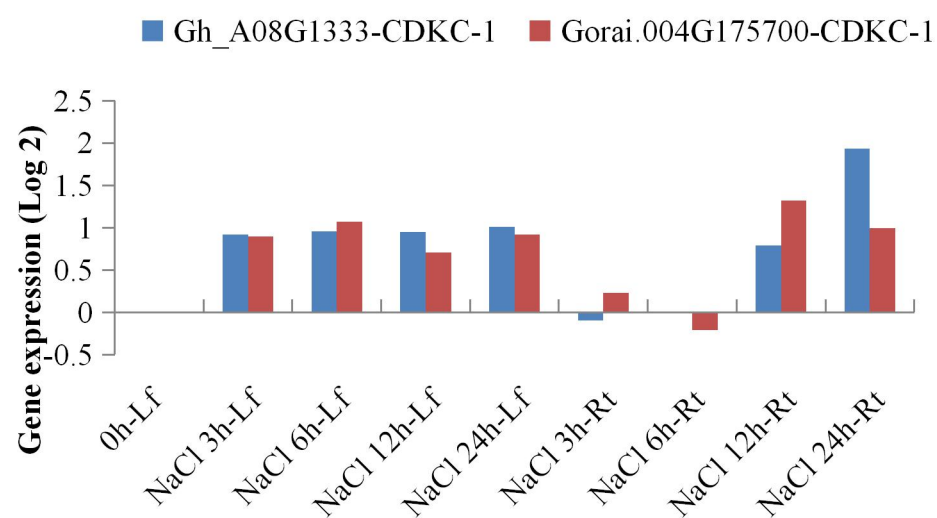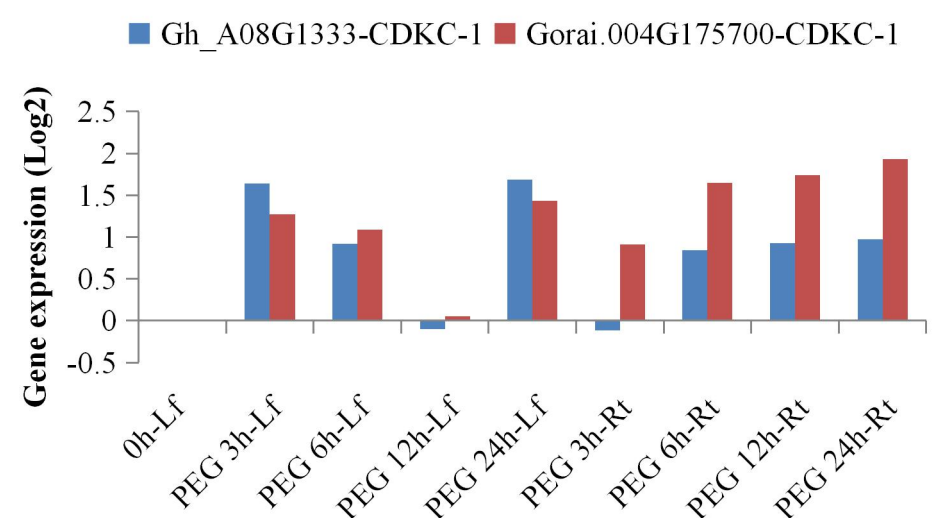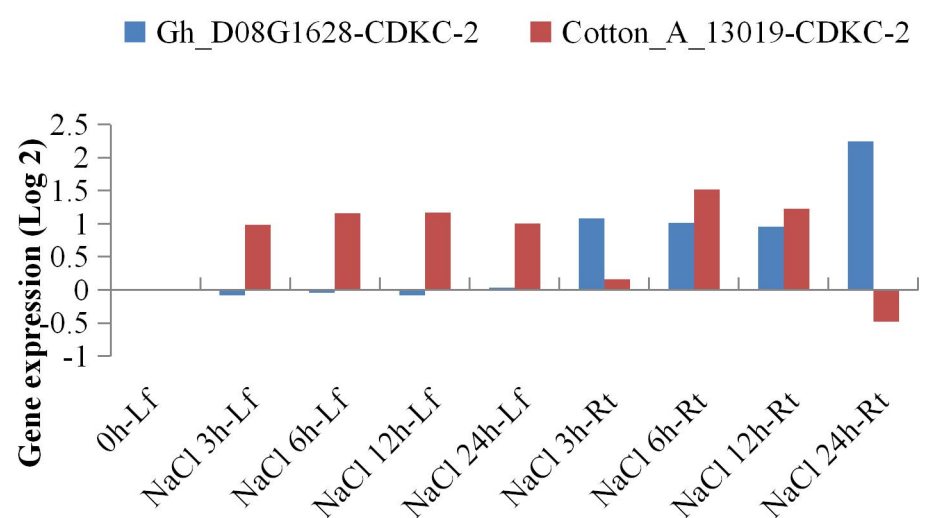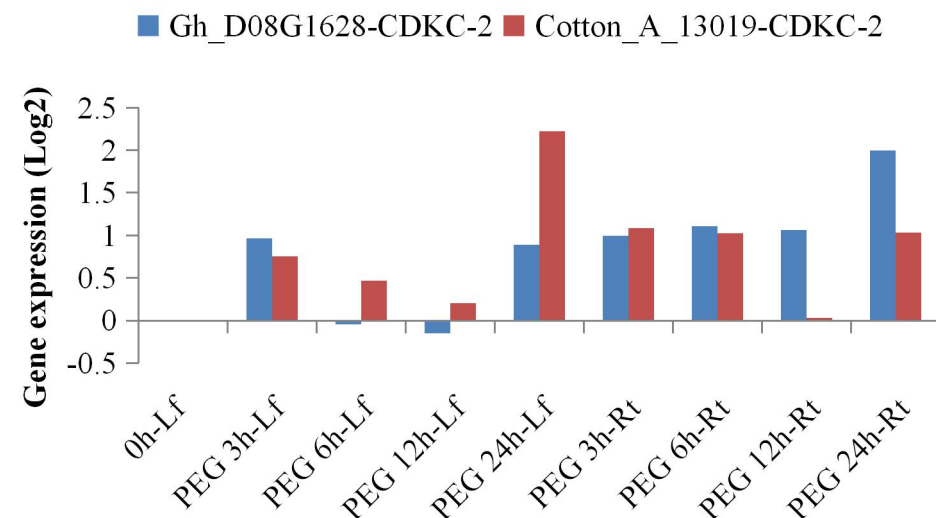

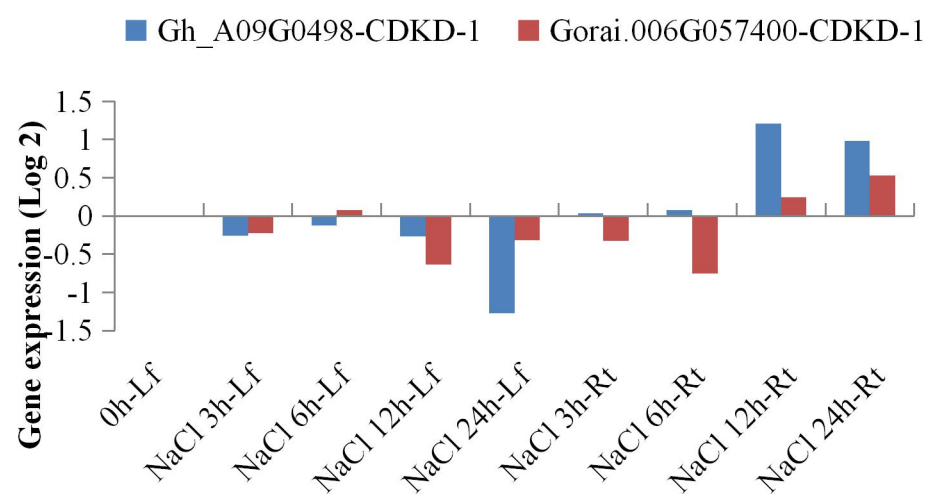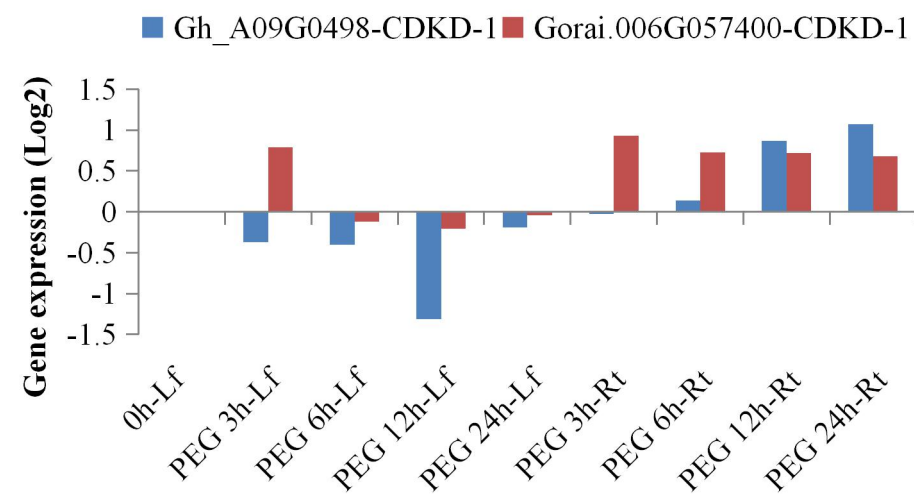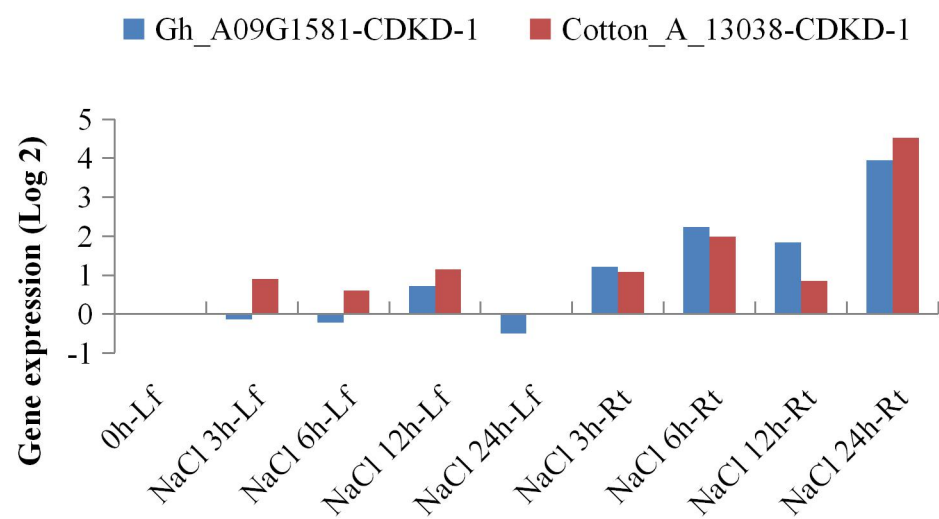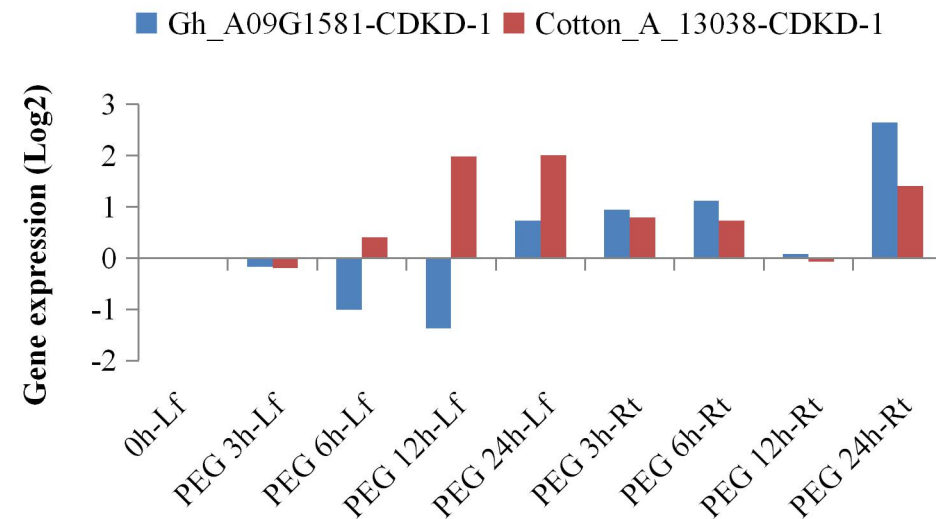

Supplement: s1 [file s1]
